# Supplementary material for: Effect of metabolic syndrome components on the risk of malignancy in patients with gallbladder lesions
Source: PubMed Central journal article supplement (PMC7847661; doi:10.7150/jca.54617), 2021-01-01
Supplement: jcav12p1531s1.pdf [file jcav12p1531s1.pdf]

Supplementary Table 1. Baseline characteristics of patients with gallbladder adenomatous polyps or gallbladder cancer

|                              | Adenomatous polyps<br>(n = 59) | Gallbladder<br>cancer<br>(n = 58) | P value           |
|------------------------------|--------------------------------|-----------------------------------|-------------------|
| Gender                       |                                |                                   | 0.520             |
| Male                         | 26 (44.1)                      | 29 (50.0)                         |                   |
| Female                       | 33 (55.9)                      | 29 (50.0)                         |                   |
| Age, mean (SD)               | 51.31 (13.84)                  | 65.84 (9.98)                      | <b>&lt; 0.001</b> |
| Number of polyps             |                                |                                   | 0.066             |
| Single                       | 32 (54.2)                      | 41 (70.7)                         |                   |
| Multiple                     | 27 (45.8)                      | 17 (29.3)                         |                   |
| Total bilirubin              | 13.15 (5.32)                   | 44.15 (88.99)                     | <b>0.009</b>      |
| Maximum diameter of polyps   | 9.27 (5.70)                    | 26.26 (22.66)                     | <b>&lt; 0.001</b> |
| With stones                  | 15 (25.4)                      | 2 (3.4)                           | <b>0.001</b>      |
| BMI $\geq$ 25                | 19 (32.2)                      | 13 (22.4)                         | 0.235             |
| Hypertension                 | 36 (61)                        | 34 (58.6)                         | 0.792             |
| Diabetes                     | 7 (11.9)                       | 10 (17.2)                         | 0.409             |
| Dyslipidemia                 | 27 (45.8)                      | 37 (63.8)                         | 0.050             |
| Total cholesterol $\geq$ 6.2 | 11 (18.6)                      | 6 (10.3)                          | 0.203             |
| TG $\geq$ 2.3                | 6 (10.2)                       | 9 (15.5)                          | 0.387             |
| Decreased HDL                | 13 (22.0)                      | 31 (53.4)                         | <b>&lt; 0.001</b> |

TG: Triglycerides; HDL, high-density lipoprotein. BMI: body mass index.

Supplementary Table 2. Univariate and multivariate analyses of the risk factors between gallbladder adenomatous polyps and gallbladder cancer

|                            | Univariate analysis |             |                   | Multivariate analysis |              |              |
|----------------------------|---------------------|-------------|-------------------|-----------------------|--------------|--------------|
|                            | OR                  | 95% CI      | P                 | Adjusted OR           | 95% CI       | P            |
| Age                        | 1.104               | 1.061-1.149 | <b>&lt; 0.001</b> |                       |              |              |
| Gender                     | 1.269               | 0.613-2.627 | 0.521             |                       |              |              |
| Number of polyps           | 0.491               | 0.229-1.054 | <b>0.068</b>      | 3.002                 | 0.812-11.101 | 0.099        |
| Total bilirubin            | 1.040               | 0.997-1.086 | <b>0.070</b>      | 1.044                 | 0.957-1.138  | 0.337        |
| Maximum diameter of polyps | 1.099               | 1.052-1.147 | <b>&lt; 0.001</b> | 1.102                 | 1.036-1.172  | <b>0.002</b> |
| Stones                     | 0.105               | 0.023-0.483 | <b>0.004</b>      | 0.119                 | 0.018-0.797  | <b>0.028</b> |
| Hypertension               | 0.905               | 0.432-1.896 | 0.792             |                       |              |              |
| Diabetes                   | 1.548               | 0.546-4.390 | 0.412             |                       |              |              |
| Decreased HDL              | 4.063               | 1.820-9.071 | <b>0.001</b>      | 5.023                 | 1.502-16.801 | <b>0.009</b> |
| BMI $\geq$ 25              | 0.608               | 0.267-1.387 | 0.237             |                       |              |              |

Model adjusted for age and sex.

OR, odds ratio; CI, confidence interval;
